# Supplementary material for: Syntheses, crystal and electronic structures, and characterizations of the mixed anions compounds Ba4In2Te2Q5 (Q = S, Se)
Source: Royal Society of Chemistry journal article supplement (doi:10.1039/c3ce40487k), 2013-01-01
Supplement: c3ce40487k.pdf [file c3ce40487k.pdf]

# Syntheses, Crystal and Electronic Structures, and Characterizations of the Mixed Anions Compounds

## Ba<sub>4</sub>In<sub>2</sub>Te<sub>2</sub>Q<sub>5</sub> (Q = S, Se)

Zhong-Zhen Luo,<sup>a,b</sup> Chen-Sheng Lin,<sup>a</sup> Wen-Dan Cheng\*,<sup>a</sup> Yi Yang<sup>a,b</sup>, Yuan-Bing Li,<sup>a,b</sup>  
Hao Zhang,<sup>a</sup> Wei-Long Zhang,<sup>a</sup> Zhang-Zhen He<sup>a</sup>

<sup>a</sup>State Key Laboratory of Structural Chemistry, Fujian Institute of Research on the Structure of Matter, Chinese Academy of Sciences, Fuzhou 350002, P. R. China

<sup>b</sup>University of Chinese Academy of Sciences, Beijing, 100039, P. R. China

\*E-mail: [cwd@fjirsm.ac.cn](mailto:cwd@fjirsm.ac.cn) (W.-D. Cheng)

### Electronic Supplementary Information

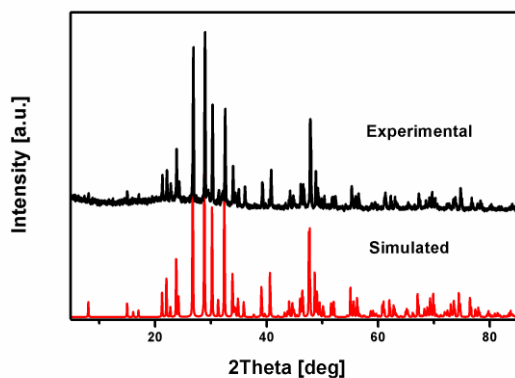

(a)

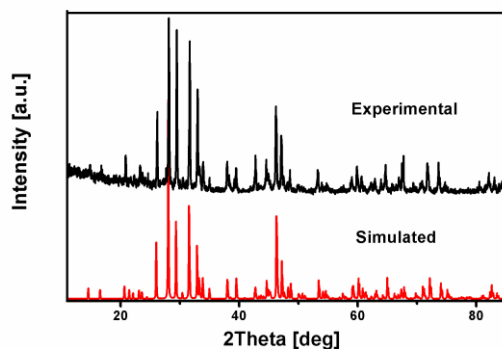

(b)

**Fig. S1** Experimental and simulated X-ray diffraction patterns for polycrystalline **1** (a) and **2** (b). (The radiation wavelength of the X-ray is  $\lambda = 1.5418 \text{ \AA}$ ).

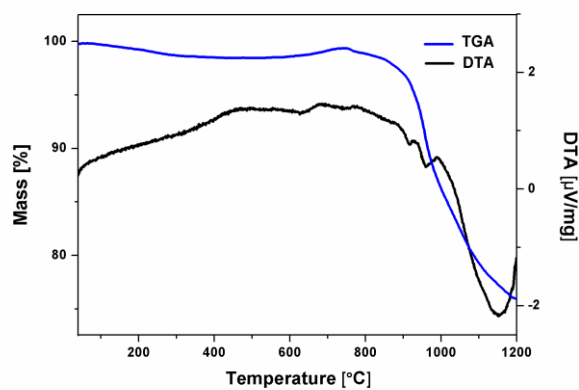

(a)

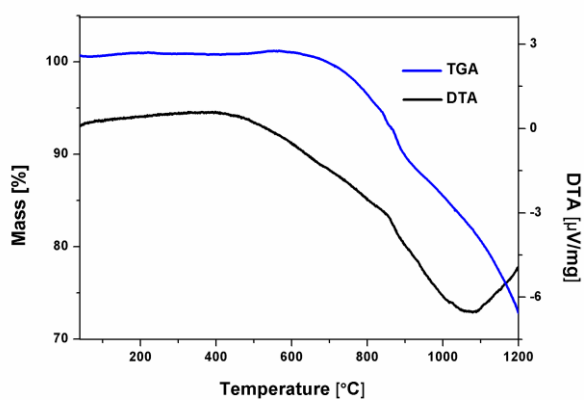

(b)

**Fig. S2** TGA and DTA diagrams of **1** (a) and **2** (b), the measurement results indicate that the two compounds are thermally stable up to high temperature.

**Table S1** Atomic coordinates and equivalent isotropic displacement parameters ( $\text{\AA}^2$ ) for compounds **1** and **2**.

| Atom                                                           | <i>x</i>  | <i>y</i>  | <i>z</i>  | $U_{eq}^a$ |
|----------------------------------------------------------------|-----------|-----------|-----------|------------|
| <b>Ba<sub>4</sub>In<sub>2</sub>Te<sub>2</sub>S<sub>5</sub></b> |           |           |           |            |
| Ba(1)                                                          | 0.6586(1) | 0.1586(1) | 0         | 0.012(1)   |
| Ba(2)                                                          | 1.0000    | 0         | 0.2822(1) | 0.014(1)   |

|                                                                 |           |           |           |          |
|-----------------------------------------------------------------|-----------|-----------|-----------|----------|
| In(1)                                                           | 0.5000    | 0         | 0.3399(1) | 0.012(1) |
| Te(1)                                                           | 0.6840(1) | 0.1840(1) | 0.5000    | 0.014(1) |
| S(1)                                                            | 0.3438(2) | 0.1562(2) | 0.1959(2) | 0.014(1) |
| S(2)                                                            | 1.0000    | 0         | 0         | 0.011(1) |
| <b>Ba<sub>4</sub>In<sub>2</sub>Te<sub>2</sub>Se<sub>5</sub></b> |           |           |           |          |
| Ba(1)                                                           | 0.6560(1) | 0.1560(1) | 0         | 0.012(1) |
| Ba(2)                                                           | 1.0000    | 0         | 0.2879(1) | 0.016(1) |
| In(1)                                                           | 0.5000    | 0         | 0.3459(1) | 0.013(1) |
| Te(1)                                                           | 0.6794(1) | 0.1795(1) | 0.5000    | 0.018(1) |
| Se(1)                                                           | 0.3412(1) | 0.1588(1) | 0.1991(1) | 0.014(1) |
| Se(2)                                                           | 1.0000    | 0         | 0         | 0.012(1) |

<sup>a</sup>  $U_{eq}$  is defined as one-third of the trace of the orthogonalized  $U_{ij}$  tensor

**Table S2** Selected bond lengths (Å), bond angles (deg) for compounds **1** and **2**.

|                                                                 |            |                   |            |
|-----------------------------------------------------------------|------------|-------------------|------------|
| <b>Ba<sub>4</sub>In<sub>2</sub>Te<sub>2</sub>S<sub>5</sub></b>  |            |                   |            |
| Ba(1)-S(1)#1                                                    | 3.079(2)   | Ba(2)-Te(1)       | 3.8913(5)  |
| Ba(1)-S(1)#2                                                    | 3.079(2)   | In(1)-S(1)        | 2.4379(19) |
| Ba(2)-Te(1)#11                                                  | 3.8913(5)  | In(1)-S(1)#6      | 2.4379(19) |
| Ba(2)-Te(1)#12                                                  | 3.8913(5)  | In(1)-Te(1)       | 2.8041(8)  |
| S(1)#1-Ba(1)-S(1)#2                                             | 89.23(8)   | S(1)-In(1)-S(1)#6 | 98.60(10)  |
| S(2)-Ba(2)-Te(1)                                                | 128.162(9) | S(1)-In(1)-Te(1)  | 114.27(3)  |
| Te(1)#11-Ba(2)-Te(1)                                            | 67.556(9)  | In(1)-S(1)-Ba(1)  | 90.15(5)   |
| <b>Ba<sub>4</sub>In<sub>2</sub>Te<sub>2</sub>Se<sub>5</sub></b> |            |                   |            |
| Ba(1)-Se(1)#1                                                   | 3.1849(12) | Ba(2)-Te(1)       | 3.9669(6)  |
| Ba(1)-Se(1)#2                                                   | 3.1849(11) | In(1)-Se(1)       | 2.5467(11) |
| Ba(2)-Te(1)#11                                                  | 3.9669(6)  | In(1)-Se(1)#6     | 2.5467(11) |
| Ba(2)-Te(1)#12                                                  | 3.9669(6)  | In(1)-Te(1)       | 2.7932(9)  |

|                      |             |                      |             |
|----------------------|-------------|----------------------|-------------|
| Se(1)#1-Ba(1)-Se(2)  | 75.573(13)  | Se(1)-In(1)-Se(1)#6  | 98.67(5)    |
| Se(1)#2-Ba(1)-Se(2)  | 75.573(13)  | Se(1)-In(1)-Te(1)    | 113.985(13) |
| Se(2)-Ba(2)-Te(1)#12 | 127.192(10) | In(1)-Te(1)-Ba(2)#12 | 123.104(18) |

Symmetry transformations used to generate equivalent atoms:

#1  $-y+1, x, z$     #2  $-y+1, x, -z$     #6  $-x+1, -y, z$

#11  $y+1, -x+1, -z+1$     #12  $-x+2, -y, -z+1$

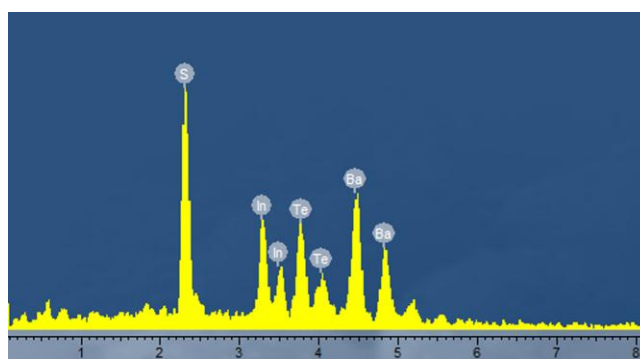

**Fig. S2** EDX spectrum of  $\text{Ba}_4\text{In}_2\text{Te}_2\text{S}_5$  single crystal.

| Point 1 |         |         |         | Point 2 |         |         |         |
|---------|---------|---------|---------|---------|---------|---------|---------|
| Element | Weight% | Atomic% | Formula | Element | Weight% | Atomic% | Formula |
| S K     | 13.30   | 38.17   | 5.10    | S K     | 13.59   | 38.75   | 5.37    |
| In L    | 20.59   | 16.50   | 2.20    | In L    | 20.65   | 16.45   | 2.28    |
| Te L    | 20.75   | 14.96   | 2.00    | Te L    | 20.14   | 14.43   | 2.00    |
| Ba L    | 45.35   | 30.38   | 4.06    | Ba L    | 45.62   | 30.37   | 4.20    |
| Totals  | 100.00  |         |         | Totals  | 100.00  |         |         |
| Point 3 |         |         |         | Point 4 |         |         |         |
| Element | Weight% | Atomic% | Formula | Element | Weight% | Atomic% | Formula |
| S K     | 12.59   | 36.63   | 4.70    | S K     | 13.74   | 39.07   | 5.74    |
| In L    | 21.67   | 17.61   | 2.25    | In L    | 20.80   | 16.52   | 2.42    |

|        |        |       |      |        |        |       |      |
|--------|--------|-------|------|--------|--------|-------|------|
| Te L   | 21.31  | 15.58 | 2.00 | Te L   | 19.03  | 13.60 | 2.00 |
| Ba L   | 44.43  | 30.18 | 3.87 | Ba L   | 46.43  | 30.82 | 4.53 |
| Totals | 100.00 |       |      | Totals | 100.00 |       |      |

**Point 5**

| <i>Element</i> | <i>Weight%</i> | <i>Atomic%</i> | <i>Formula</i> |                                                                                                |
|----------------|----------------|----------------|----------------|------------------------------------------------------------------------------------------------|
| S K            | 12.96          | 37.42          | 5.69           |                                                                                                |
| In L           | 22.69          | 18.29          | 2.78           | Average formula: Ba <sub>4.2(7)</sub> In <sub>2.3(8)</sub> Te <sub>2</sub> S <sub>5.3(2)</sub> |
| Te L           | 18.13          | 13.15          | 2.00           |                                                                                                |
| Ba L           | 46.21          | 31.14          | 4.73           |                                                                                                |
| Totals         | 100.00         |                |                |                                                                                                |

**Point 1**

**Point 2**

| <i>Element</i> | <i>Weight%</i> | <i>Atomic%</i> | <i>Formula</i> | <i>Element</i> | <i>Weight%</i> | <i>Atomic%</i> | <i>Formula</i> |
|----------------|----------------|----------------|----------------|----------------|----------------|----------------|----------------|
| Se L           | 32.05          | 43.54          | 5.60           | Se L           | 31.13          | 42.47          | 5.15           |
| In L           | 16.62          | 15.53          | 2.00           | In L           | 17.55          | 16.47          | 2.00           |
| Te L           | 14.41          | 12.11          | 1.56           | Te L           | 13.49          | 11.39          | 1.38           |
| Ba L           | 36.92          | 28.83          | 3.71           | Ba L           | 37.83          | 29.67          | 3.60           |
| Totals         | 100.00         |                |                | Totals         | 100.00         |                |                |

**Point 3**

**Point 4**

| <i>Element</i> | <i>Weight%</i> | <i>Atomic%</i> | <i>Formula</i> | <i>Element</i> | <i>Weight%</i> | <i>Atomic%</i> | <i>Formula</i> |
|----------------|----------------|----------------|----------------|----------------|----------------|----------------|----------------|
| Se L           | 31.43          | 42.47          | 5.15           | Se L           | 31.00          | 42.37          | 5.70           |
| In L           | 17.55          | 16.47          | 2.00           | In L           | 15.82          | 14.87          | 2.00           |
| Te L           | 13.49          | 11.39          | 1.38           | Te L           | 15.97          | 13.51          | 1.82           |
| Ba L           | 37.83          | 29.67          | 3.60           | Ba L           | 37.21          | 29.25          | 3.93           |
| Totals         | 100.00         |                |                | Totals         | 100.00         |                |                |

---

**Point 5**

---

| <i>Element</i> | <i>Weight%</i> | <i>Atomic%</i> | <i>Formula</i> |                                                                                                 |
|----------------|----------------|----------------|----------------|-------------------------------------------------------------------------------------------------|
| Se L           | 31.00          | 42.37          | 5.70           |                                                                                                 |
| In L           | 15.82          | 14.87          | 2.00           | Average formula: Ba <sub>3.7(5)</sub> In <sub>2</sub> Te <sub>1.6(2)</sub> Se <sub>5.4(6)</sub> |
| Te L           | 15.97          | 13.51          | 1.82           |                                                                                                 |
| Ba L           | 37.21          | 29.25          | 3.93           |                                                                                                 |
| Totals         | 100.00         |                |                |                                                                                                 |

---
